# Supplementary material
Source: publisher site journal article supplement (https://www.degruyterbrill.com/publication/isbn/9783110418040/downloadAsset/9783110418040_ERM%20presentation%20slides%203.pdf)

# Engineering Risk Management

## Lecture 3

### Process safety

Prof. dr. ir. Genserik Reniers  
Safety and Security Science Group (TU Delft)  
KULeuven (Campus Brussel, CEDON)  
UAntwerpen (ARGoSS)

[g.i.l.m.e.reniers@tudelft.nl](mailto:g.i.l.m.e.reniers@tudelft.nl)  
[Genserik.reniers@kuleuven.be](mailto:Genserik.reniers@kuleuven.be)  
[Genserik.reniers@uantwerpen.be](mailto:Genserik.reniers@uantwerpen.be)

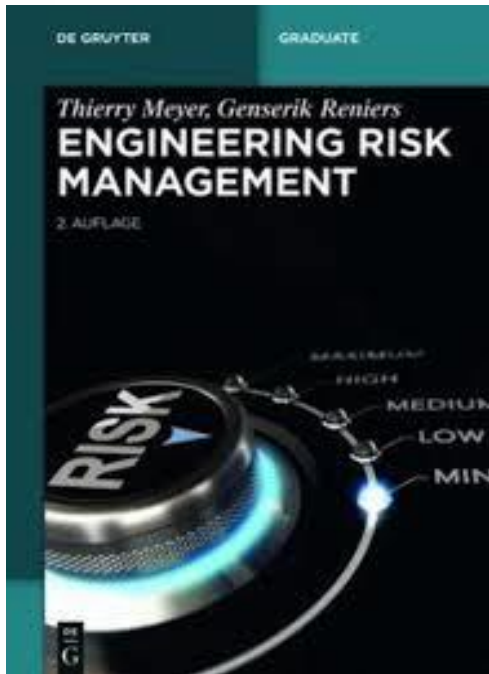

# Chemical industry: perception?

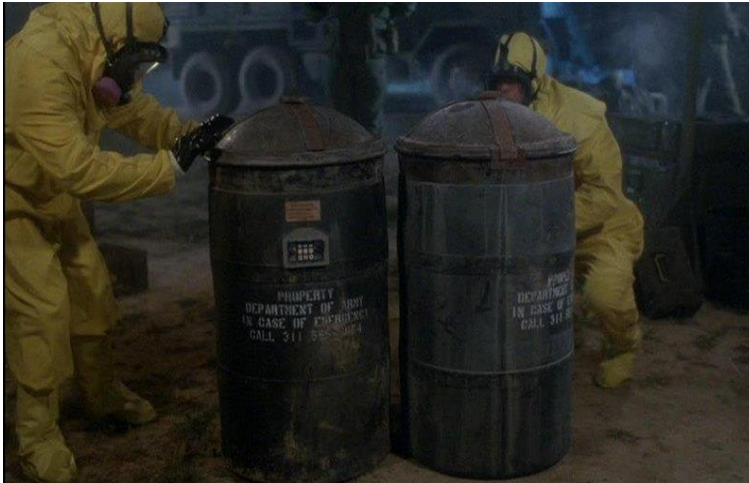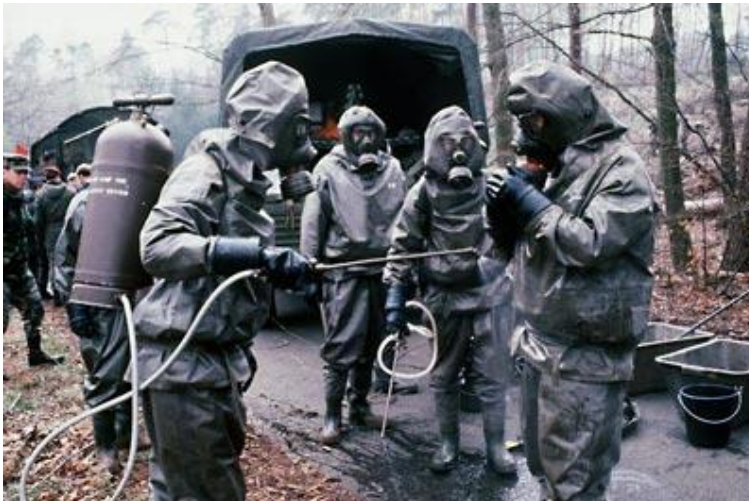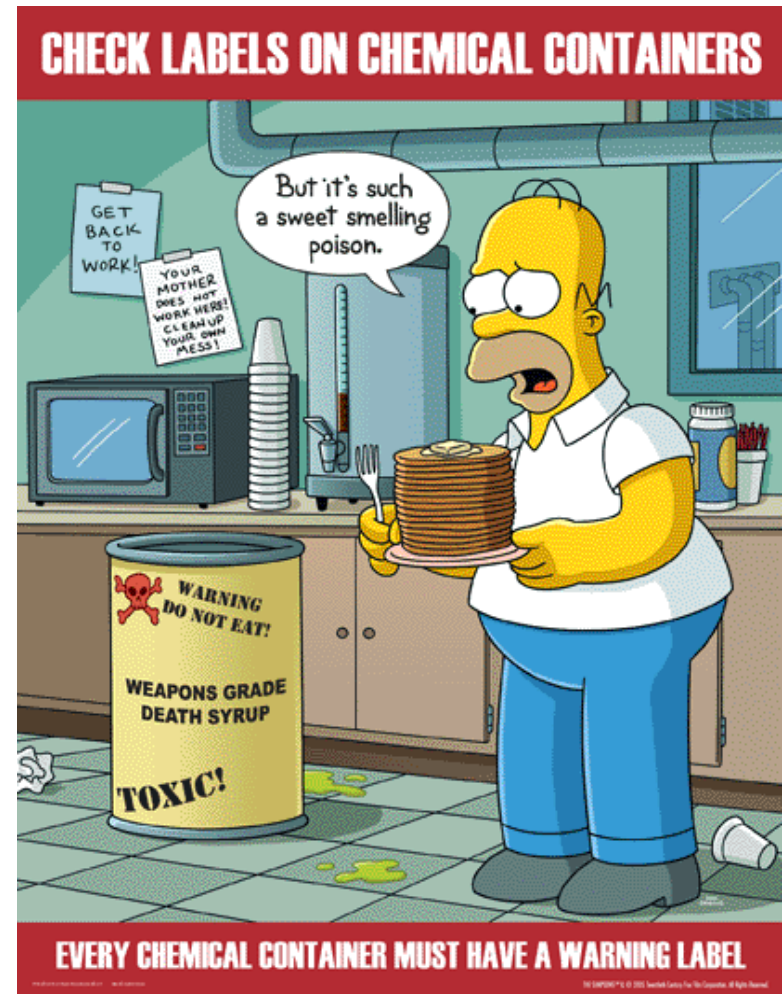



# Chemical industry: perception!

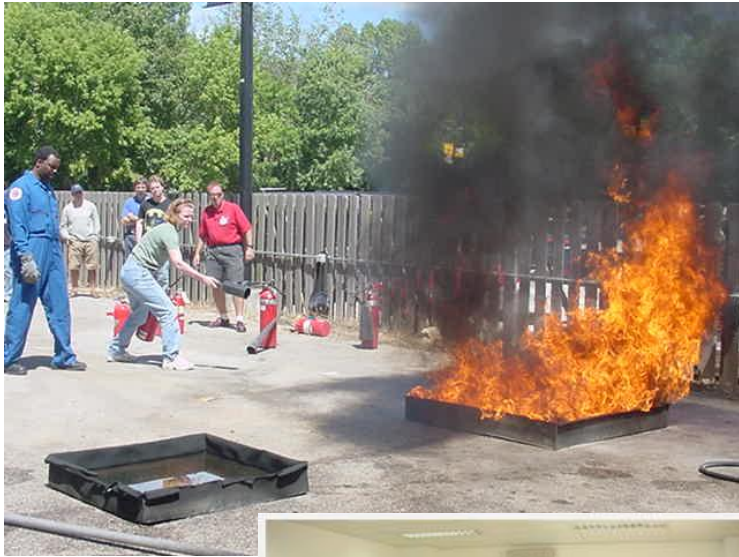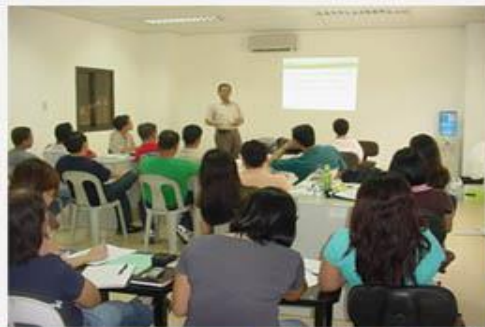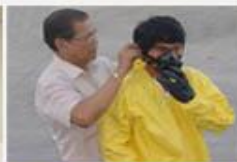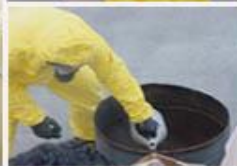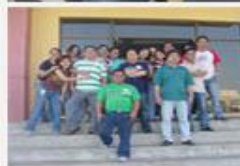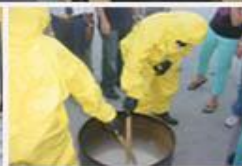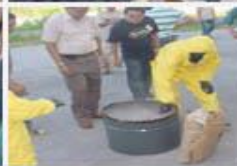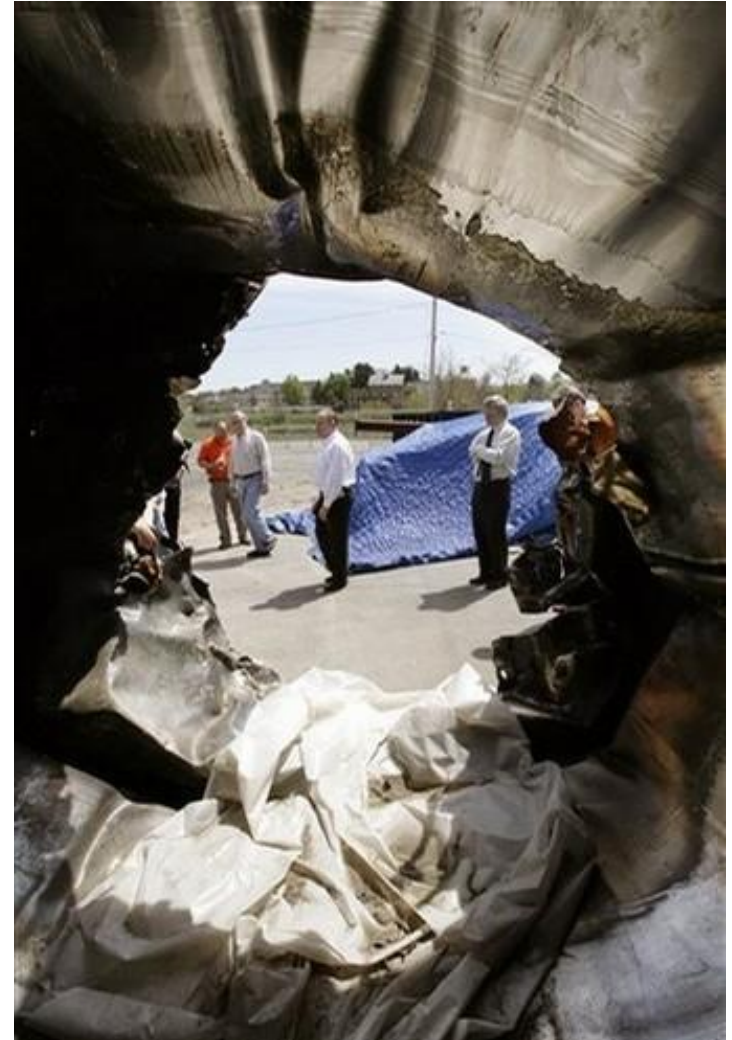

# Why? - Safety and Security Concerns

- **Prudence due to industrial activities** should be present in every industry, and certainly also in the hazardous materials using industries
- **Characteristics of chemicals using industries:** use of hazardous materials, existence of chemical industrial parks, license to operate/acceptability linked with reputation, high uncertainties linked with debatable opinions
- **The Netherlands & Belgium:** densely populated areas combined with highly concentrated chemical industrial activities
- The Rotterdam & Antwerp Port Areas are part of the **"ARRRA"** and are extremely important for the Dutch (/Belgian/German/European) economies

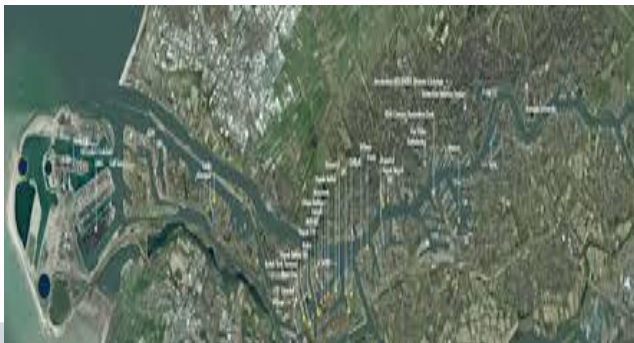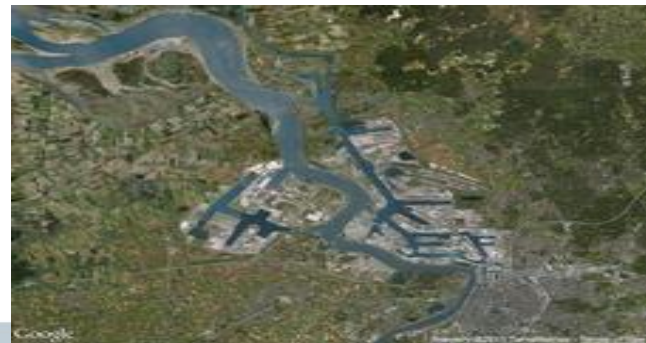

# The “Delta Region” in Europe

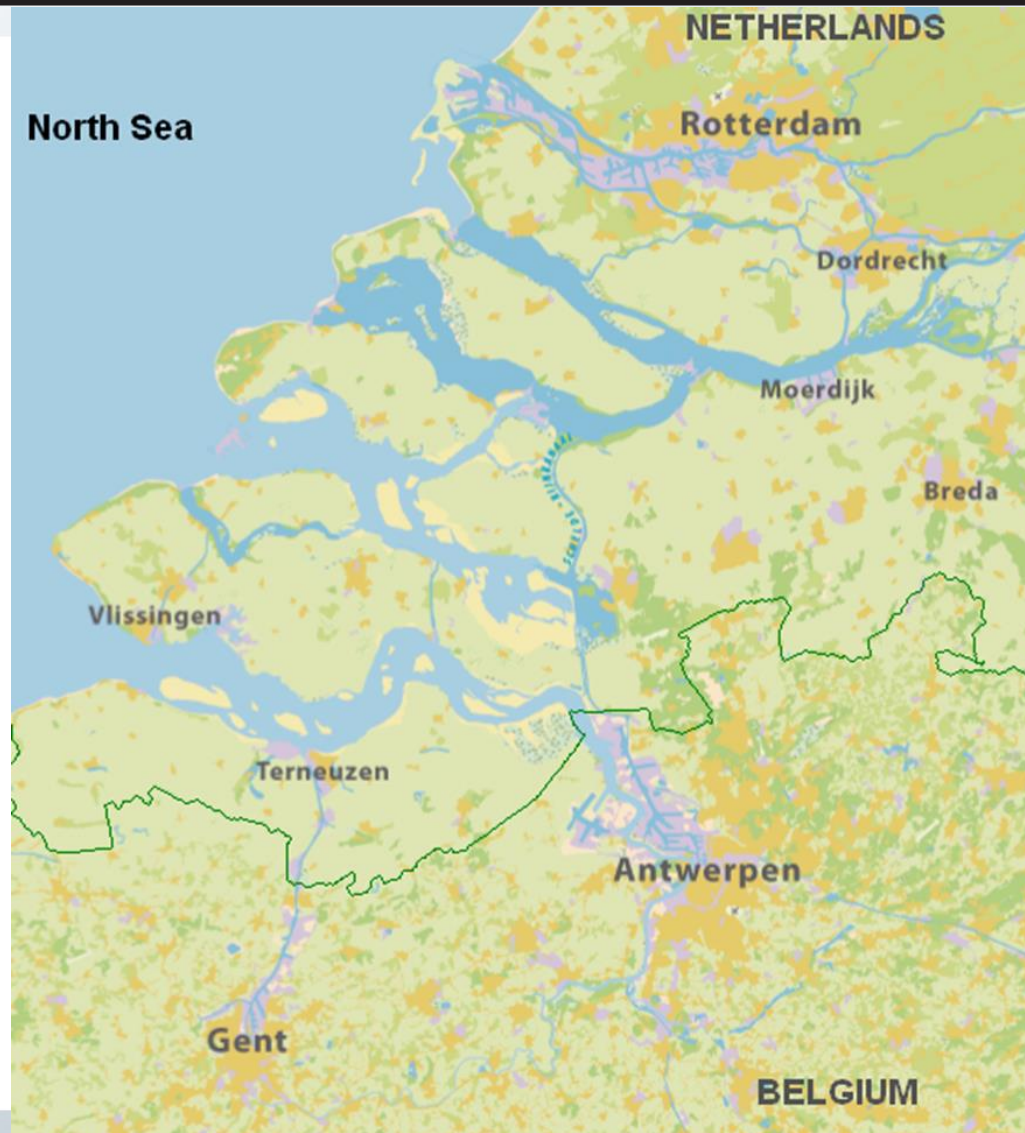



# Belgian Seveso Industry (1)

~400 "Seveso"  
Companies

~200 Upper tier

~200 Lower tier

Concentrations:

**Antwerp**

**Ghent-Coast**

**Kortrijk**

**Mechelen-Brussel**

**Albert Channel -  
Lommel**

**Mons - Feluy -  
Charleroi - Liège**

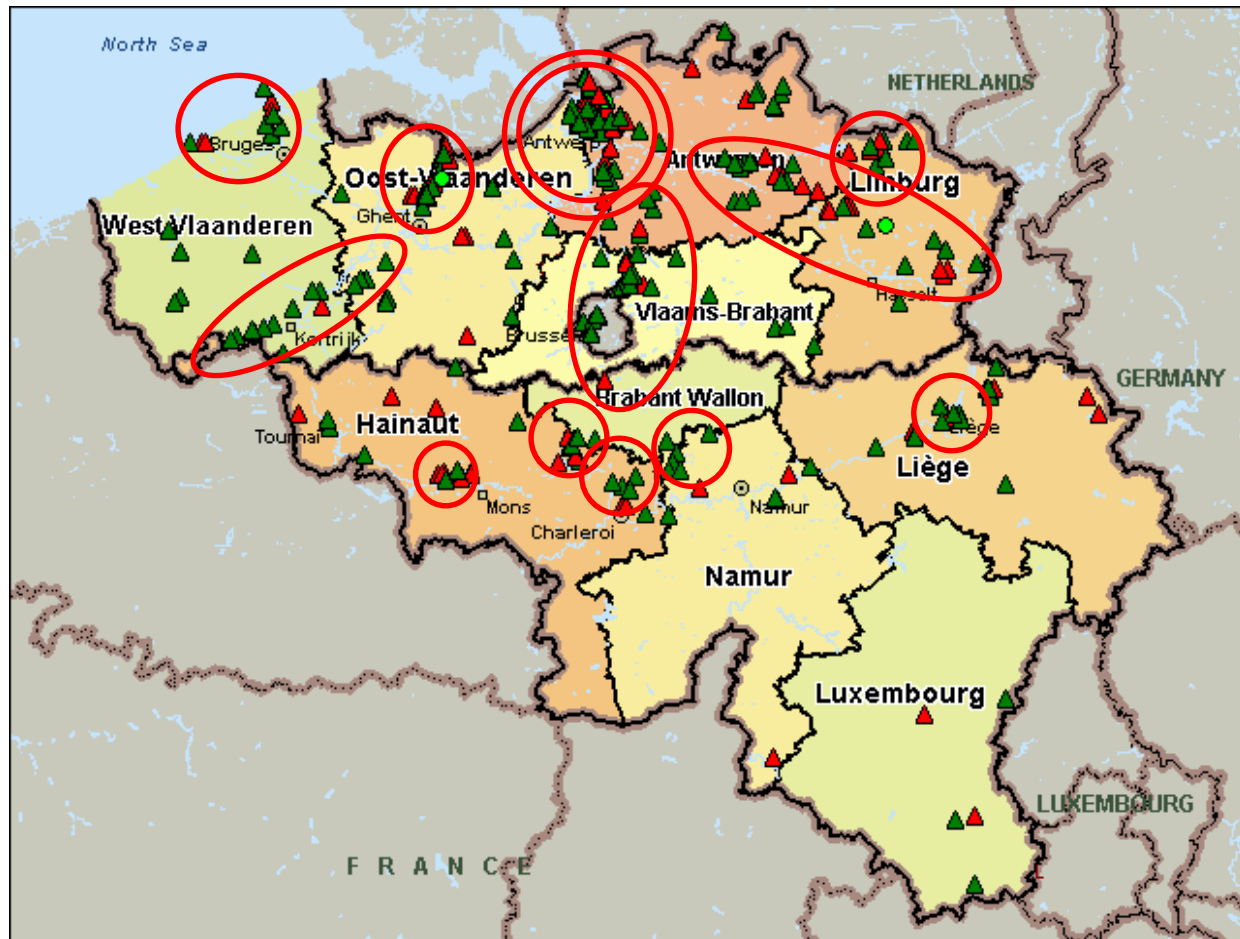

# Belgian Seveso Industry (2)

Antwerp

Largest European chemical and petrochemical complex

“second to Houston”

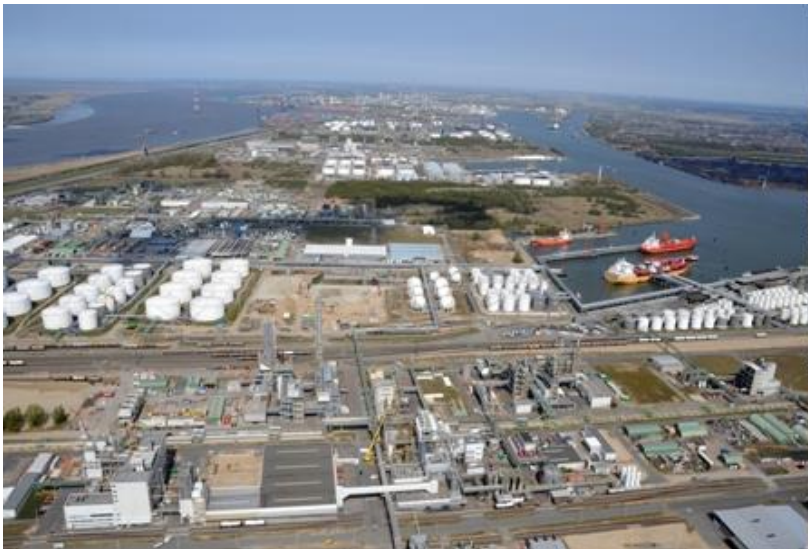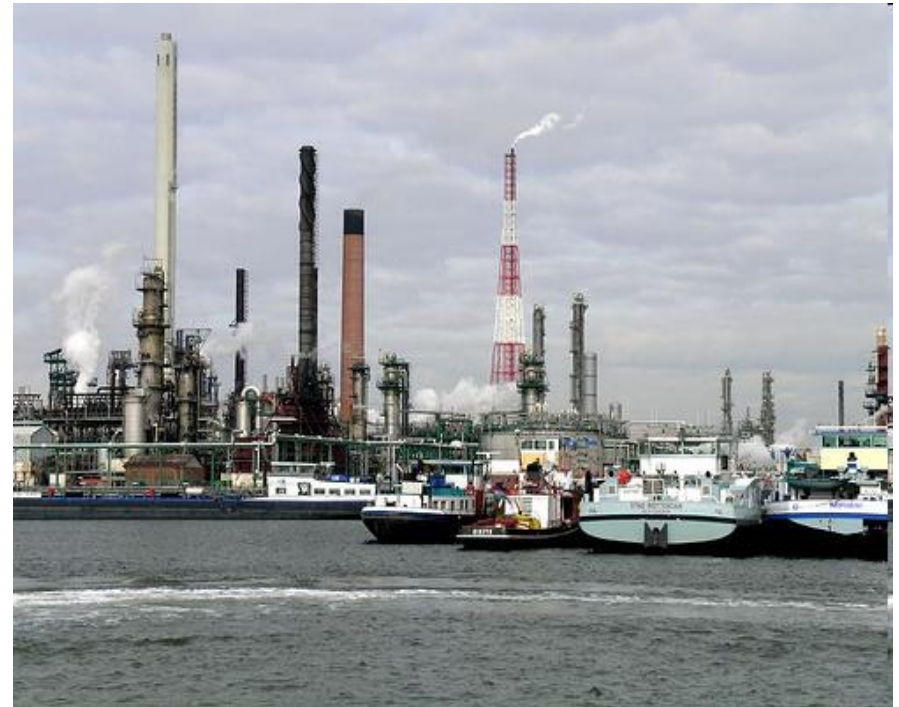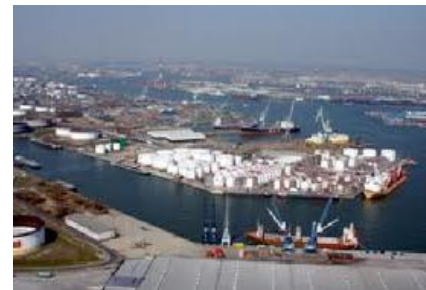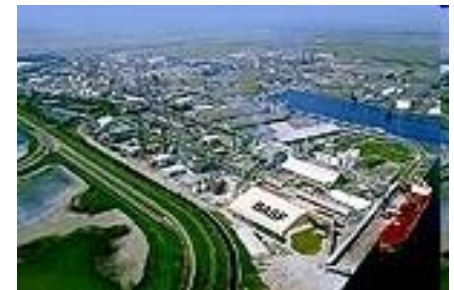



# The Antwerp Harbour

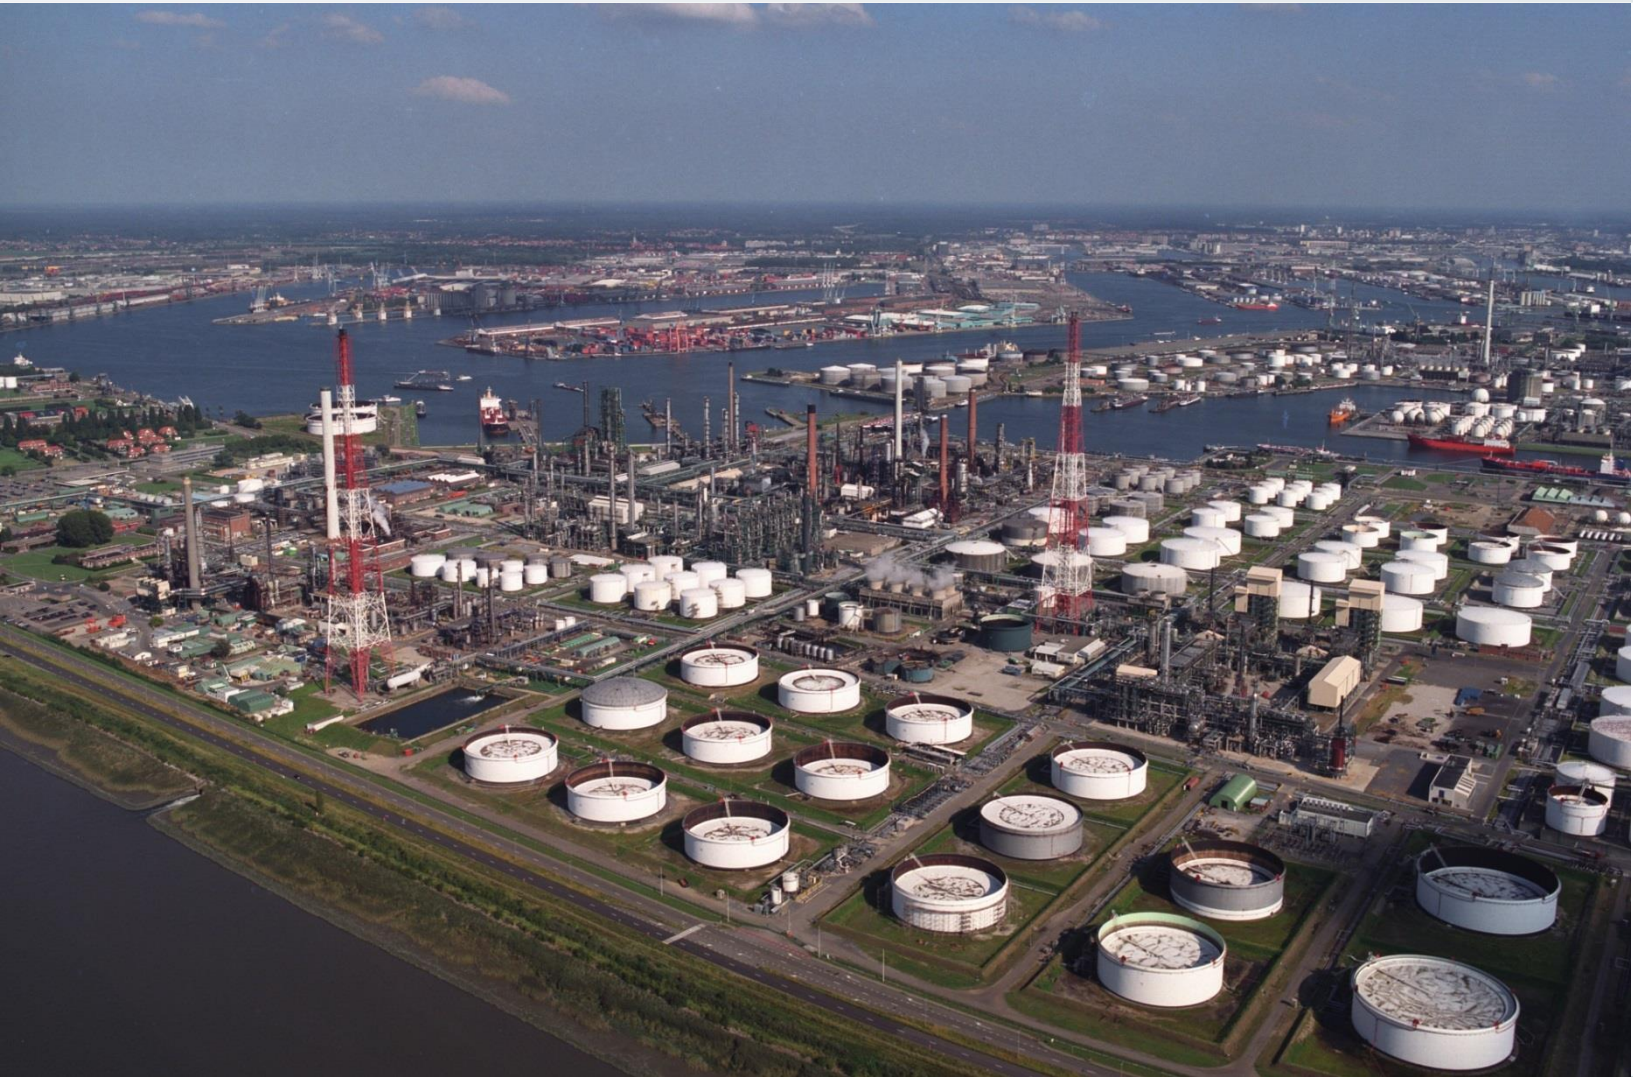



# PROCESS RISKS ?

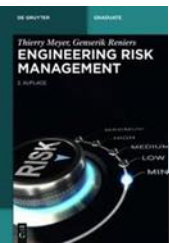

# Process installations

- Unique composition of unit operations:
  - Pressure vessels
  - Storage tanks
  - pipelines
  - Pumps, compressors
  - Heat exchangers
  - Chemical reactors
  - Distillation towers ....
- Typical dangers
  - Chemical substances (at certain pressures and temperatures)
  - Chemical reactions





# Definition Process safety

- CCPS – Center for Chemical Process Safety

Is a **discipline** aimed at the **prevention and mitigation of fires, explosions and accidental releases of chemicals in process installations**. It is not about the well-known personal safety issues (occupational safety).

Process safety is a blend of engineering and management characteristics focusing on the prevention of catastrophic accidents such as explosions, fires and toxic releases, due to the use of chemicals and petroleum derivatives.



# Process safety incident

- A sudden or unexpected event, in which chemicals or petroleum derivatives are involved or within a (petro)chemical installation, that resulted, or **had the potential to result** in a release of a hazardous material.  
Such incidents may cause toxic effects, fires or explosions and may lead to serious injuries, fatalities, environmental damage, damages to the installation and product loss.
- Process safety incidents may happen as a result of the operation of the installation under normal, abnormal or transient conditions or due to activities taking place within the installation (maintenance, construction, pipework, ...)

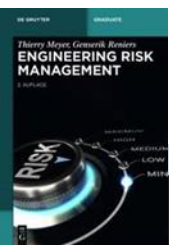



# Process safety

- Twofold objective
  - Prevention of unwanted releases of substances and/or energy (Loss Of Containment or 'LOC') from process installations
  - Limitation of the consequences
- Visual representation in the bow-tie model:

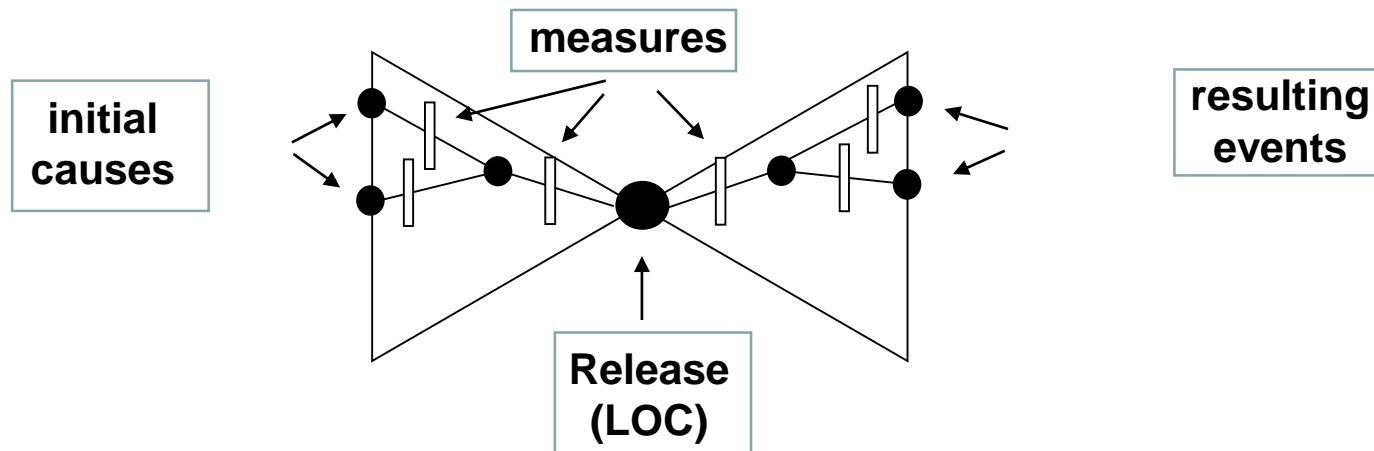

# **What is specific about process safety?**





# Process safety – some characteristics

- HILP (large uncertainties)
- Process safety is difficult to measure
- Process safety is difficult to observe
- Process safety delivers the 'license to operate'!



# HILP

- Own employees, surrounding communities, financial/economic, reputation, license to operate (industry)
- Chemical disasters are rare
- Danger of complacency (habituation and denial of risks (“We work so long without any accident now”))
- Probabilities are difficult to quantitatively estimate
- Cost-benefit analysis is difficult
- Large prevention investments for technical safety measures that (hopefully) will never have to work

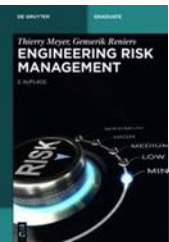

# Difficult to measure

- Occupational accidents (type I) are no measure of process safety (type II)
- Measurement of process safety via “indicators” (process safety indicators providing a proxy of reality) is difficult
- Importance of safety culture
  - Focus on minor shortcomings, besides evident matters
  - Strong respons on weak signals
  - Typical for so-called “High Reliability Organisations”

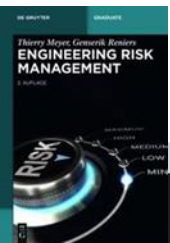



# Difficult to observe

- Problems with installations only in a limited way visually observable
- Behaviour of engineers, technicians, management ... in design, maintenance, exploitation, ...of installations of crucial importance, but very hard to observe → importance of safety culture

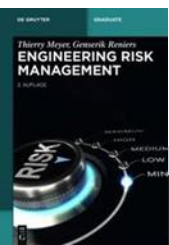

# Process safety delivers the 'license to operate'!

Some iconic accidents that influenced the 'license to operate' in the past:

- Seveso (1976)
- Bhopal (1984)
- Chernobyl (1986)
- Macondo well (Deepwater Horizon) (2010)
- Fukushima (2011)



# MOVIE

- Movie Bhopal disaster!

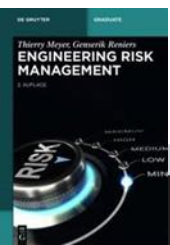



# **PROCESS SAFETY LEGISLATION/ MGT/ INSPECTION in Europe?**



# Seveso (III) legislation

“Lower tier” (Low tier) companies and “Upper tier” (Top tier) companies: obligations:

- **Lower Tier:** prevention policy, prevention policy document, safety management system, inspection at least every 3 years
- **Upper tier:** prevention policy, prevention policy document, safety management system + safety report, scenarios of major accidents, internal emergency plan, QRA calculations (IR, SR), actualized list of substances, environmental risk assessment, inspection at least every year



# Performance monitoring, internal audit, accident & incident investigations, knowledge management

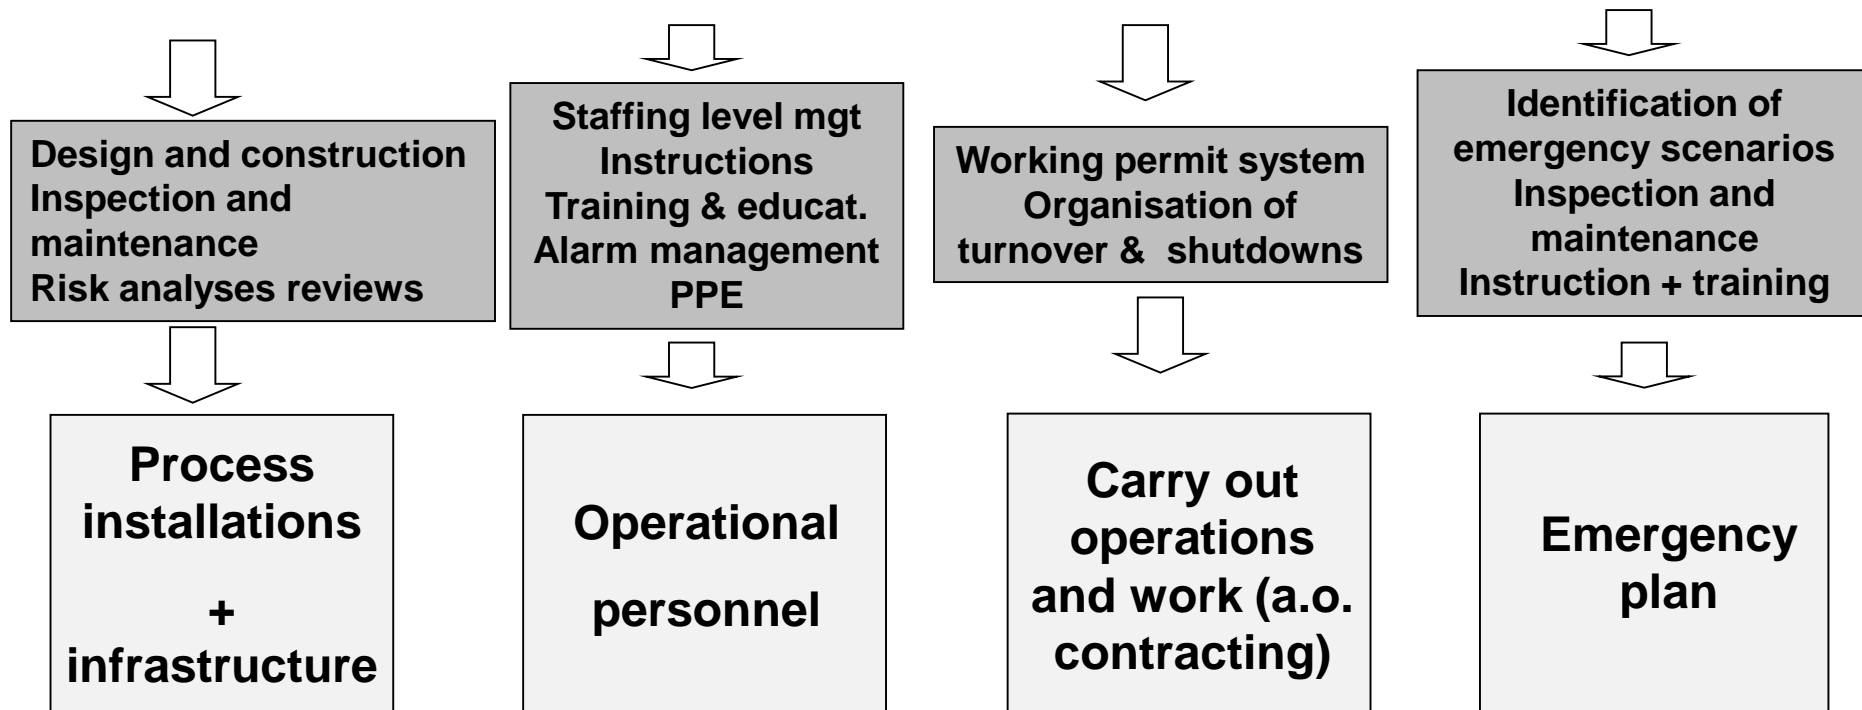

# Background of process safety: Observable causes of LOCs

- Deviations (due to defects in equipment or due to errors of operators)
- Degradation of 'containments'

## Risk analysis (of installation)

- Carrying out tasks

## Risk analysis (of tasks)

- Design errors
- Construction errors
- Maintenance errors
- Errors at commissioning and decommiss.

Mgt systems for  
design,  
maintenance and  
inspection,  
exploitation





## Consequences of LOC: highly uncertain

- LOC
  - Where in the installation? Size of leak?
  - Duration of leak?
  - Difficult to determine probability
- Loss of Containment of inflammable substances
  - Formation of explosive atmosphere? (conditions of ventilation?)
  - Ignition source(s)?
  - Overpressure outcome or flash fire?
  - Effects of overpressure on buildings?
  - Presence of people?
  - Protection?
  - Domino-effects?



# Consequences of LOC: highly uncertain

- Release of toxic substance
  - Formation of cloud?
  - Concentration within cloud?
  - Dispersion of the cloud?
  - Presence of people?
  - Possibilities of evacuation?
  - Uncertainties regarding dose-response



# Control of process risks

- Basic principle: multiple “barriers”
  - Literature: “protection layers”, “swiss cheese”
  - No ‘trade off’ prevention – mitigation
- Types of “barriers” or “safety functions”
  - 8 strategies to intervene in the chain of events
- Separate study of every safety function
  - Separate evaluation criteria
    - Preventive: rather risk-based
    - Mitigation: rather hazard-based
  - Every study requires specific expertise
  - Corresponds to existing industrial practice



# Control of process risk scenarios (due to inflammable liquids)

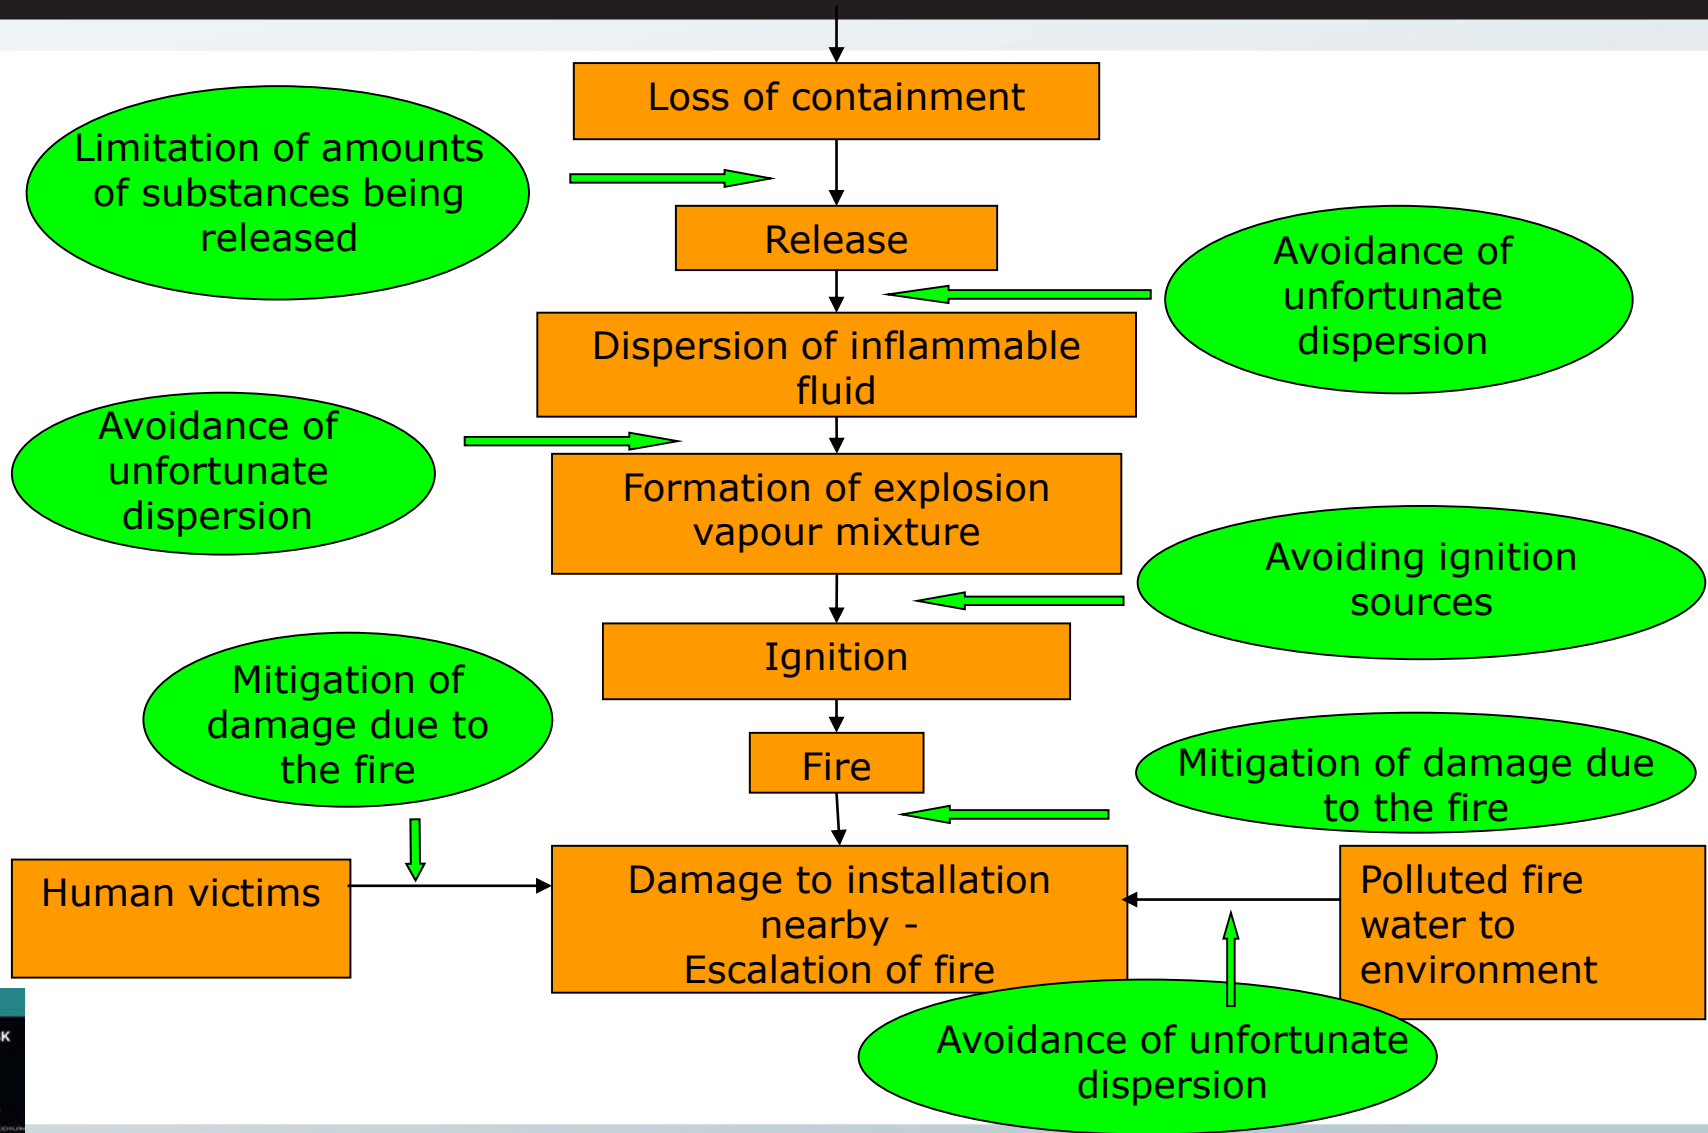



# Control of process risk scenarios (due to toxic substances)

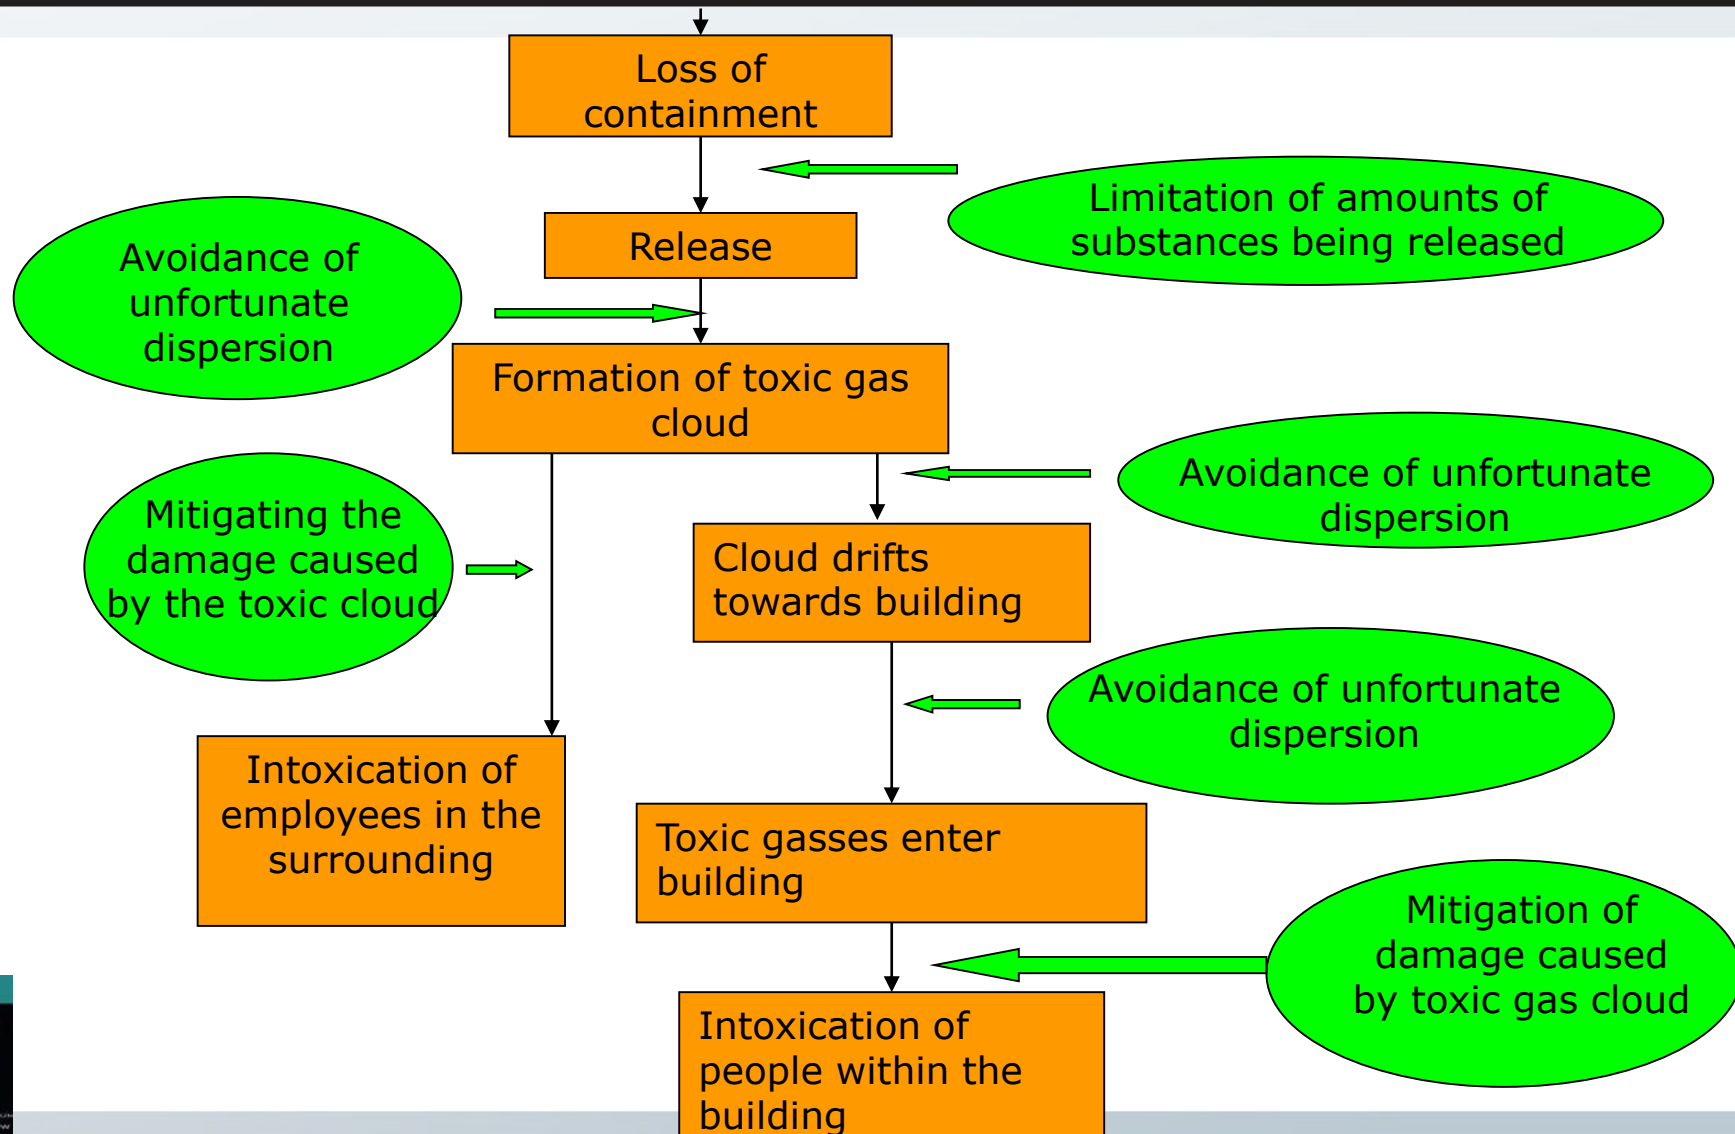

# Safety functions

- Control of process deviations
- Control of degradation of containment

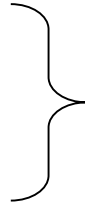

Prevention

- Limitation of releases
- Control of the dispersion of released substances
- Avoidance of ignition sources
- Mitigation of damage due to the fire
- Mitigation of damage due to explosion
- Avoidance of damage due to toxic gas clouds

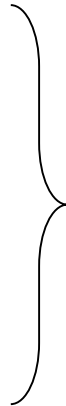

Mitigation



# Process deviations

- Process deviations are deviations from the 'normal' process operation
- Normal operation is characterized by
  - The control system
    - Directs the process: automatic (DCS) or manually (operators)
    - Defines an 'operational window': 'normal' values of process parameters
  - The 'containments':
    - Keep substances and energy enclosed (pipework, pressure vessels, storage tanks, pumps, etc.)
    - Are able to withstand 'normal' process conditions (pressure, temperature, corrosive substances, ...)
    - Are able to withstand 'normal' external influences (wind, ice, ...)



# Risks of process deviations

- Undesired loss of containment of substances and/or energy:
  - By surpassing design boundaries of the containments
    - Too high or too low pressure, temperature, ...
  - By breaking through in outgoing streams/flows
    - Eg. Flowing out of atmospheric tank in case of overfilling (Buncefield)
    - Eg. Flowing out of dangerous gasses from scrubber (Bhopal)
    - Eg. Flowing out in case of draining
  - By undesired opening of installation
    - Uncoupling of (filled) flexibles
    - Opening of installation part for adding products



# Measures to control process disturbances

- Containments that are able to withstand abnormal forces/load
  - For disturbances/deviations that lead to surpassing the design envelope / design boundaries
  - ‘Inherent safety’ (if control of degradation)
  - Economics plays a role
- Preventive active (safety) measures:
  - Instrumental safety (SIF: safety instrumented functions)
    - Automatic actions or locks
  - Mechanical pressure relief
    - Safety valves, rupture discs, explosion hatches
  - Corrective human behavior/handling
    - Human actions based on alarm(s)



# Instrumental safety (SIFs)

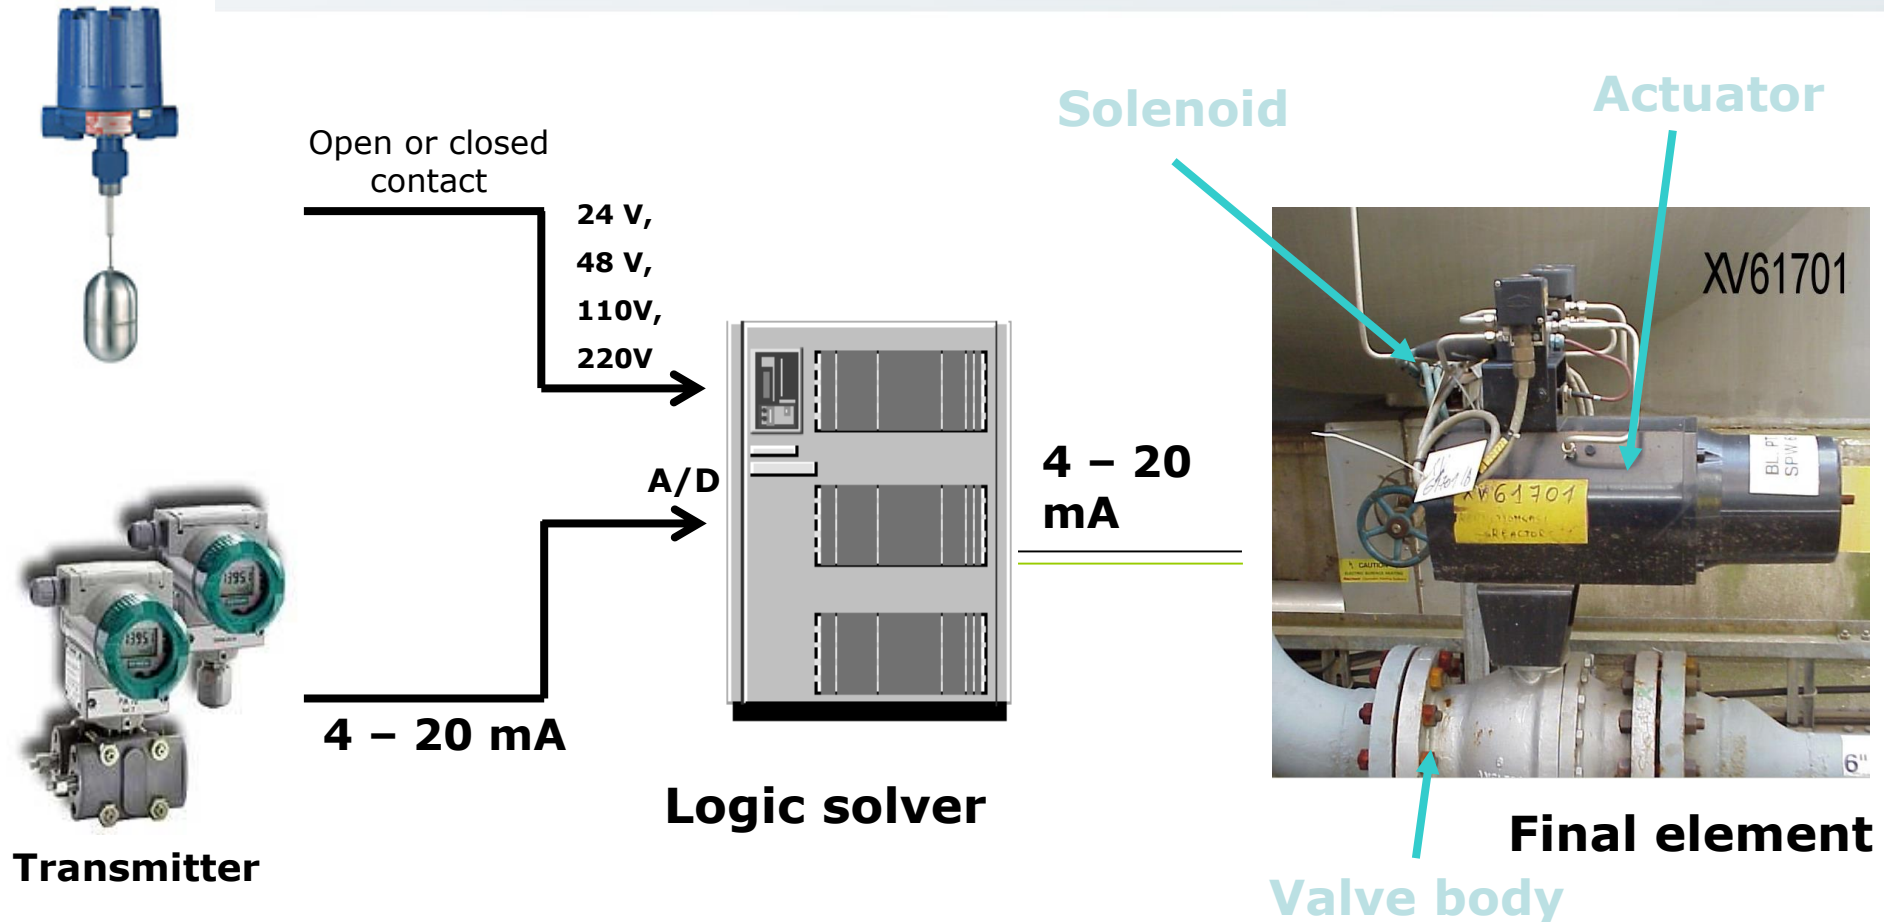

**Sensor**





# Safety valves (with springs)

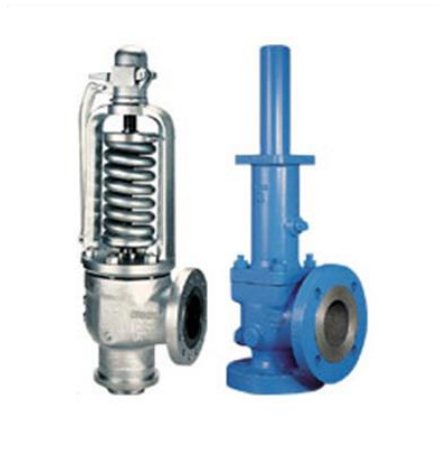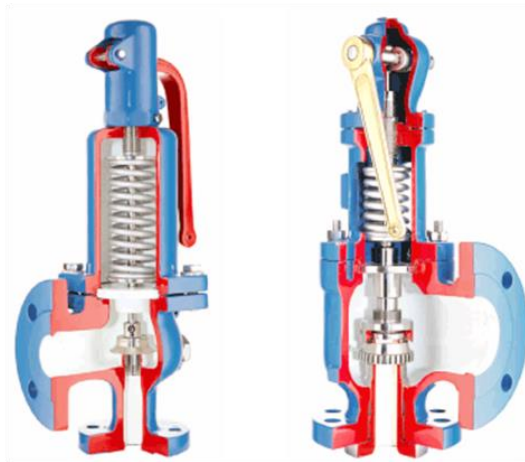

Safety valves (with  
springs)

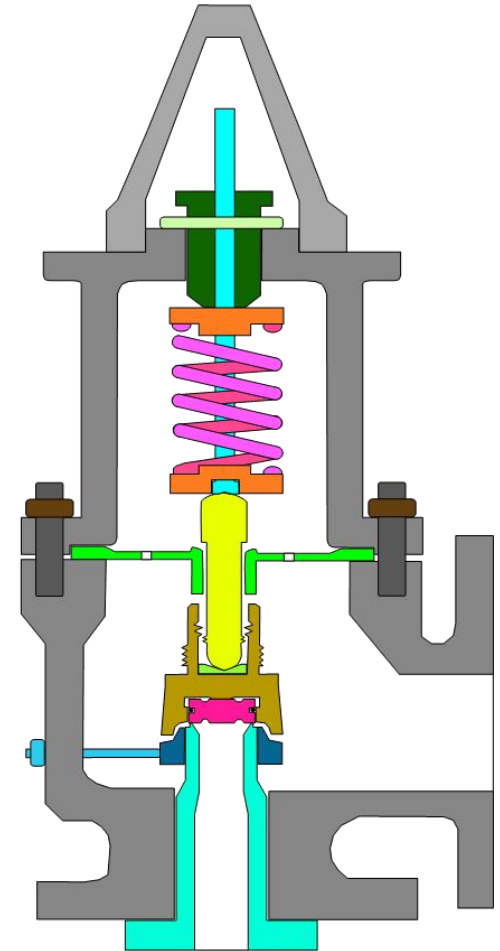

# Rupture discs

Rupture discs

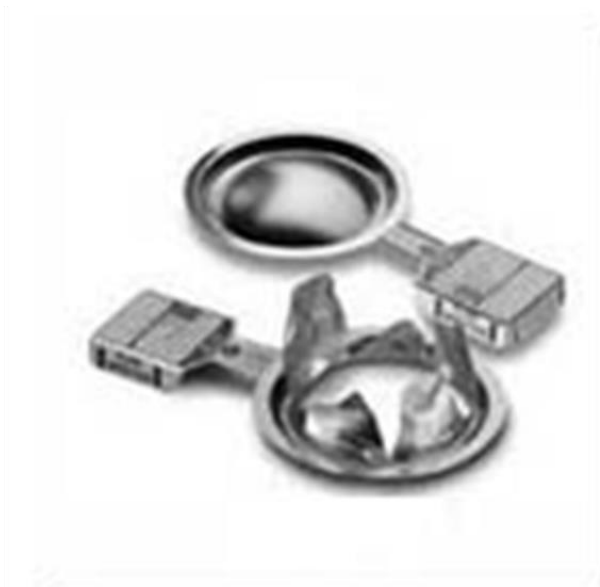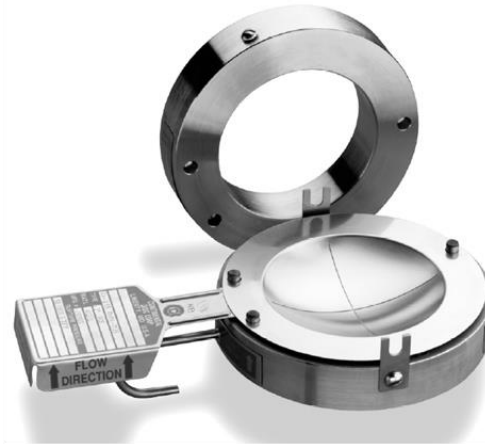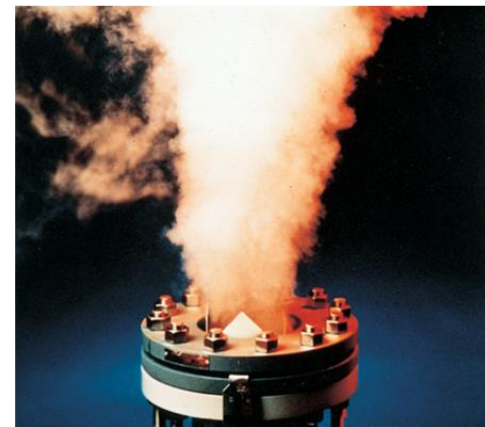

# Approach to control process deviations

- Identify the need for measures
  1. Type-deviations and type-measures for type-installation parts
    - Checklists
      - E.g. Design solutions for equipment failures (CCPS)
      - E.g. Process safety in batch reactor systems (ICHEME)
    - Risk assessment methods such as Planop ([www.planop.be](http://www.planop.be))
  2. Identify 'rest' risks of deviations
    - Use a structured/systematic risk assessment method (e.g. HAZOP)
  3. Use risk evaluation techniques
- Specify measures in detail + implement



# Type-measures for type-installation parts

- “Design solutions for equipment failures” (CCPS)
  - Contains tables with typical deviations and typical measures for the following types of installation parts:
    - Vessels
    - Reactors
    - Mass transfer equipment
    - Heat transfer equipment
    - Dryers
    - Fluid transfer equipment
    - Solid-fluid separators
    - Solids handling and processing equipment
    - Fired equipment
    - Piping and piping components



# Example (excerpt) of table from “Design solutions for equipment failures” (CCPS)

**TABLE 4. FAILURE SCENARIOS FOR REACTORS**

| No. | Operational Deviations                                   | Failure Scenarios                                                | Potential Design Solutions                                                                                                                                                                                                                                                                                                                                                                                       |                                                                                                                                                                                                                                                                                                                                                                                                                                                                                                                    |                                                                                                                                                                                                                                                                                                                                                                                                                                                                    |
|-----|----------------------------------------------------------|------------------------------------------------------------------|------------------------------------------------------------------------------------------------------------------------------------------------------------------------------------------------------------------------------------------------------------------------------------------------------------------------------------------------------------------------------------------------------------------|--------------------------------------------------------------------------------------------------------------------------------------------------------------------------------------------------------------------------------------------------------------------------------------------------------------------------------------------------------------------------------------------------------------------------------------------------------------------------------------------------------------------|--------------------------------------------------------------------------------------------------------------------------------------------------------------------------------------------------------------------------------------------------------------------------------------------------------------------------------------------------------------------------------------------------------------------------------------------------------------------|
|     |                                                          |                                                                  | Inherently Safer/Passive                                                                                                                                                                                                                                                                                                                                                                                         | Active                                                                                                                                                                                                                                                                                                                                                                                                                                                                                                             | Procedural                                                                                                                                                                                                                                                                                                                                                                                                                                                         |
| 1   | Overpressure (Batch, Semi-batch, and Plug Flow Reactors) | Overcharge of catalyst resulting in runaway reaction             | <ul style="list-style-type: none"> <li>• Use dedicated catalyst charge tank sized to hold only the amount of catalyst needed</li> <li>• Vessel design accommodating maximum expected pressure</li> <li>• Use different type of reactor</li> </ul>                                                                                                                                                                | <ul style="list-style-type: none"> <li>• Emergency relief device</li> <li>• Pressure or temperature sensors actuating bottom discharge valve to drop batch into a dump tank with diluent, poison or short-stopping agent, or to an emergency containment area</li> <li>• Automatic addition of diluent, poison, or short-stopping agent directly to reactor</li> <li>• Limit quantity of catalyst added by flow totalizer</li> </ul>                                                                               | <ul style="list-style-type: none"> <li>• Procedural controls on the amount or concentration of catalyst to be added</li> <li>• Manual activation of bottom discharge valve to drop batch into dump tank with diluent, poison, or short-stopping agent, or to an emergency containment area</li> <li>• Manual addition of diluent, poison, or short-stopping agent directly to reactor</li> <li>• Intermediate location for pre-weighed catalyst charges</li> </ul> |
| 2   | Overpressure (Batch and Semi-batch Reactors)             | Addition of a reactant too rapidly resulting in runaway reaction | <ul style="list-style-type: none"> <li>• Limit delivery capacity of feed system to within safe feed rate limitations (e.g., screw feeder for solids or flow orifice for liquids)</li> <li>• Vessel design accommodating maximum expected pressure</li> <li>• Select feed system pressure characteristic so that feed cannot continue at reactor overpressure</li> <li>• Use different type of reactor</li> </ul> | <ul style="list-style-type: none"> <li>• Temperature or pressure sensor interlocked to a shutoff valve in the feed line</li> <li>• Emergency relief device</li> <li>• Pressure or temperature sensors actuating bottom discharge valve to drop batch into a dump tank with diluent, poison or short-stopping agent, or to an emergency containment area</li> <li>• Automatic addition of diluent, poison, or short-stopping agent directly to reactor</li> <li>• High flow shutdown alarm and interlock</li> </ul> | <ul style="list-style-type: none"> <li>• Manual addition of diluent, poison, or short-stopping agent directly to reactor</li> <li>• Manual shutdown on high flow alarm</li> <li>• Manual activation of bottom discharge valve to drop batch into dump tank with diluent, poison, or short-stopping agent, or to an emergency containment area</li> <li>• Procedural controls on concentration of reactants</li> </ul>                                              |

# General Failure Tree for overpressure in reactor from “Chemical reaction hazards” (IChemE)

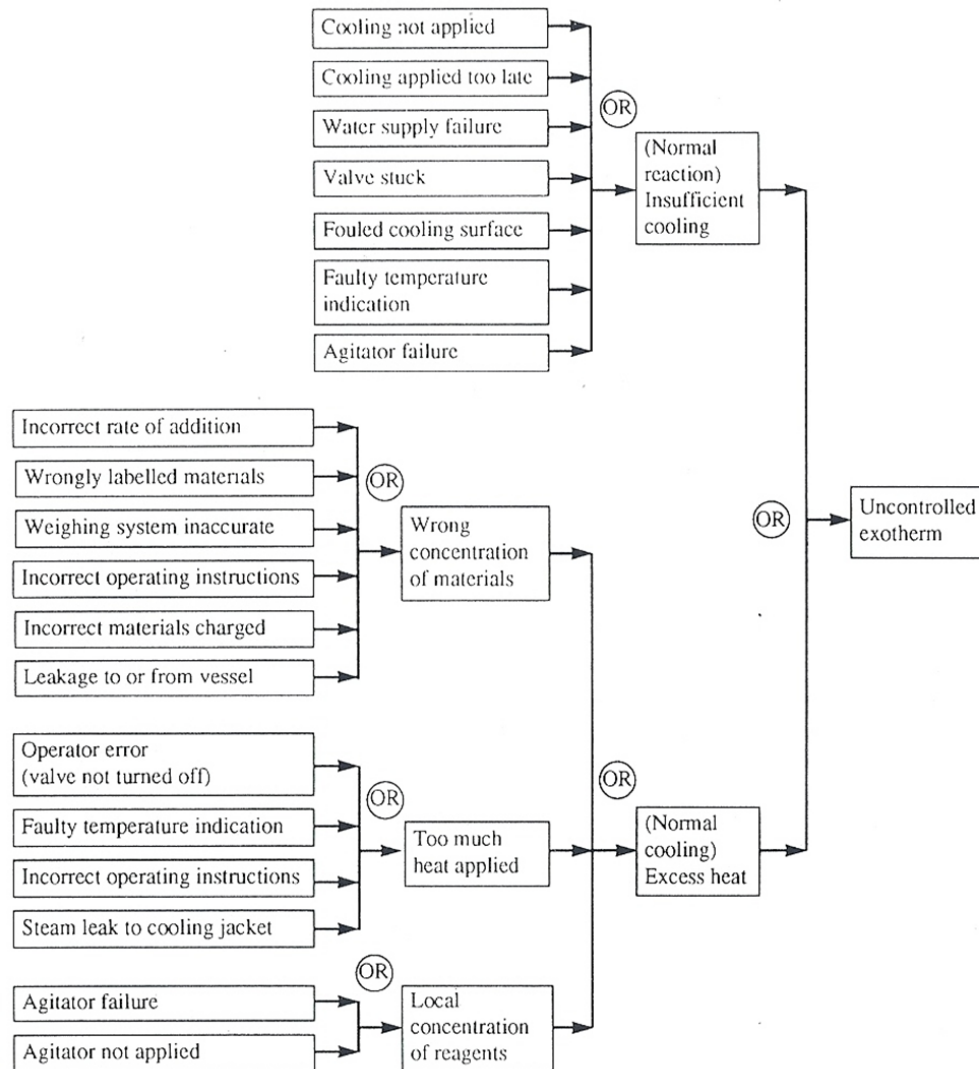



# Use of evaluation techniques

- How many protection layers are necessary?
  - For instance scenarios of overpressure
    - A safety valve?
    - A SIF + a safety valve...?
- Evaluation techniques (for process deviations)
  - Risk matrix
  - LOPA: Layer of Protection Analysis



- Prevention of loss of containment by degradation



# Degradation of containment

- 'Slow', irreversible damage of containment
- Slow:
  - To be followed-up by inspections, monitoring, ...
  - Very sudden degradation => to be considered as process disturbance
- Damage:
  - Decreasing wall thickness (local or general)
  - tears, hydrogen embrittlement, prolapse
- Irreversible:
  - Risk of loss of containment (leak, rupture, ...) increases with time
  - Until reparation or replacement

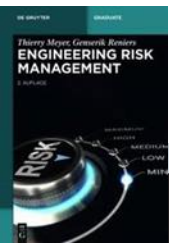

# Degradation phenomenon

- Decrease of wall thickness
  - Internal corrosion
    - By substances present, sediments
    - Differential aëration (at the level of the liquid level)
  - Erosion
    - Cavitation
    - High liquid velocities (curves, narrowings)
    - Presence of particles
  - Erosion-corrosion
    - The protective corrosion layer disappears due to erosion
  - External corrosion
    - underground corrosion
    - Exposure to atmospheric conditions
    - Corrosion under isolation (rain water and condens in contact with steel)



# Degradation phenomenon

- Formation of tear
  - Stress corrosion cracking
- Degradation by hydrogen
  - Hydrogen embrittlement
  - Hydrogen blistering
- Creep
  - By (very) high temperature
- Fatigue
  - By cyclic load/forces
- Prolapses
  - By an unstable underground
- Deformations



# Degradation – some examples

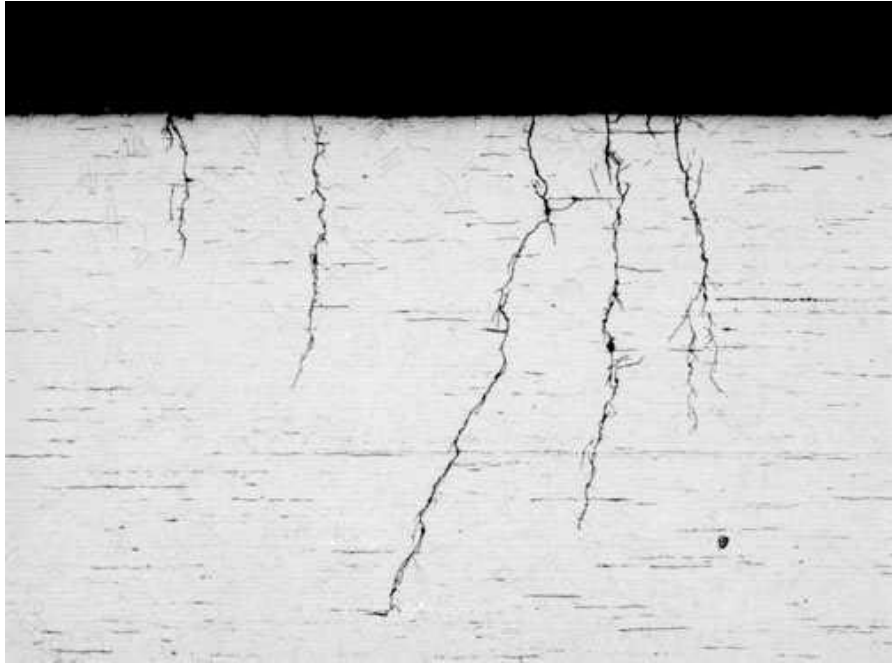

Microscopic detail of stress corrosion cracking

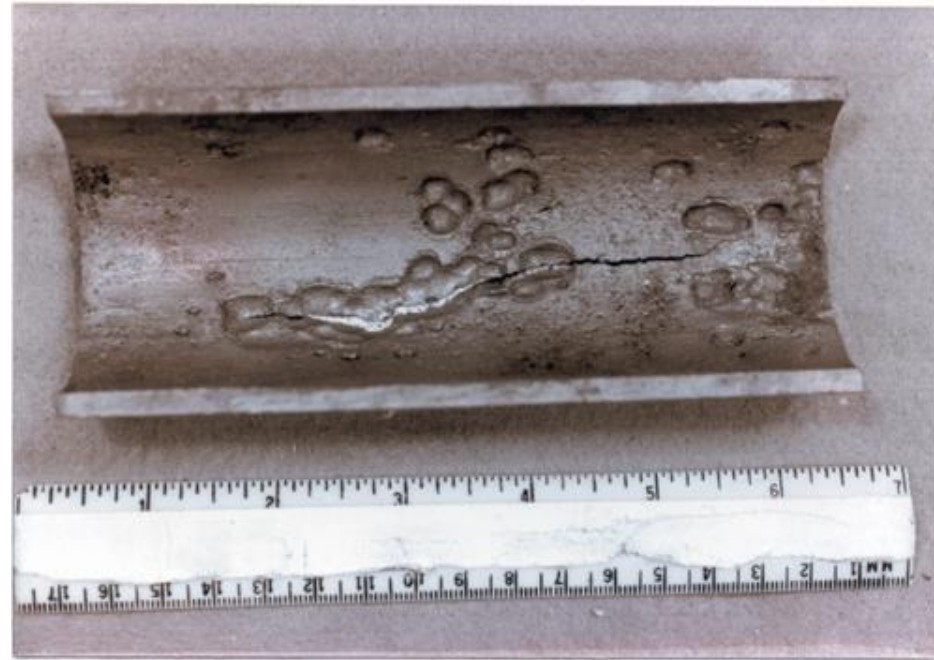

Pitting corrosion

# Resulting risks due to degradation

- Containment can no longer carry out its function, which is
  - To offer resistance against forces
  - To shield from the surrounding
- During the 'normal' working or in case of deviations
- May result in:
  - Explosive failure
  - rupture
  - Leak

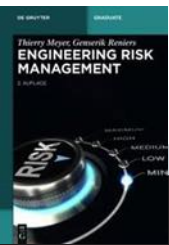



# Measures against degradation

- Choice of process conditions
- Choice of materials
- Layers of protection (internal or external)
- Inspection
  - Detection of damage
  - Evaluation of damage
  - Corrigerende actie nemen
    - Repair (temporary, permanently, ...)
    - Adapted/changed working conditions
    - decommissioning
  - Determine new inspection period



# Detection of damage

- Visually
- Detection- and measuring equipment
  - Technique is tuned into the to be expected damage
  - Meseure where damage can be expected
- Qualification/knowledge of inspectors very important

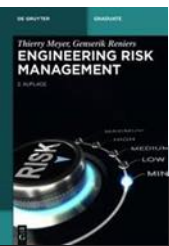

# Evaluation of determined damage

- Need for unambiguous and clear criteria
  - E.g. measurement of thickness: minimal thickness
- Well-described conclusions in the report!
- Sometimes calculations are necessary for ‘fitness for service analysis’



# Approach to deal with degradation of containment

- Identification of all containments
  - All pipework
  - All process vessels
  - All atmospheric storage tanks
- Per containment: identification of to be expected degradation phenomena
  - Internal: based on operational conditions
  - External: isolation? Loss of containment in surrounding and/or environment?
- Draft inspection program
  - Techniques in function of to be expected damage
  - First inspection-interval should be relatively short
- Carry out inspections, evaluate results
  - If necessary: take actions



# Overview of prevention and protection measures (also for dealing with domino effects)

See Book "Domino Effects  
in the Process Industries"  
(Reniers and Cozzani) - Elsevier

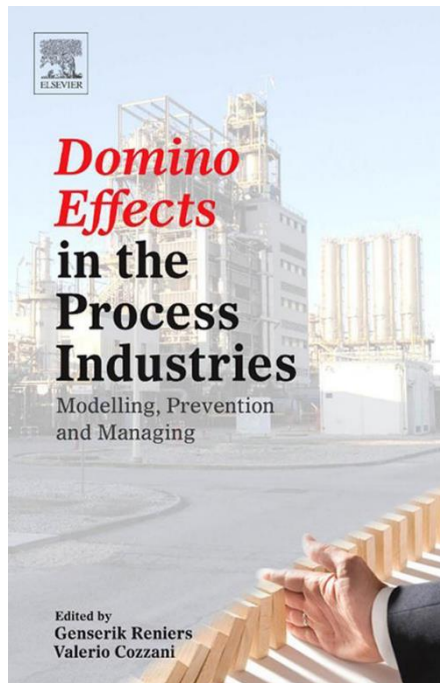

| Damage preventing                 | Design or controle                     | Measure                                                                                                                                                                                                                                                                                                                                                                                                                                                                                                                                                                                                                                         |
|-----------------------------------|----------------------------------------|-------------------------------------------------------------------------------------------------------------------------------------------------------------------------------------------------------------------------------------------------------------------------------------------------------------------------------------------------------------------------------------------------------------------------------------------------------------------------------------------------------------------------------------------------------------------------------------------------------------------------------------------------|
| Damage-preventing                 | Design<br>Equipment lay out            | <ul style="list-style-type: none"> <li>Choice of the right materials.</li> <li>Pressure resistance of the equipment.</li> <li>Mechanical overpressure protection, rupture disks, pressure relief valves, blow down tanks.</li> <li>Corrosion resistance.</li> <li>Supporting equipment for recipients and pipes.</li> <li>Vent sizing.</li> <li>Inherent safety design (can tolerate some equipment failures).</li> <li>Emergency stop buttons.</li> <li>Flame arrestors.</li> </ul>                                                                                                                                                            |
| Damage-preventing                 | Design<br>Preventing Fire              | <ul style="list-style-type: none"> <li>Thermal protections.</li> <li>Differential Protections.</li> <li>Use of non flammable materials.</li> <li>Non flammable gaskets and valves. (containment)</li> <li>Avoiding unstable products.</li> <li>Preventing oil getting into substances as rockwool.</li> <li>Gas detectors.</li> <li>Smoke detectors.</li> <li>The permanent leakage detection system is incorporated in the inspection programme.</li> <li>Radiation shields.</li> <li>Pressure shields and explosion films.</li> </ul>                                                                                                         |
| Damage-preventing                 | Design Proces<br>controle              | <ul style="list-style-type: none"> <li>Safety integrity levels, redundancy.</li> <li>Preventive maintenance logging and investigations.</li> <li>Automatic monitoring, continu monitoring.</li> <li>Safety studies installation and product: HAZOP, What if, Swift, ...</li> <li>Incidents/dangerous situations/near misses, logging and investigations.</li> <li>Steering of installations by remote controll.</li> <li>Installation of independant interlocks.</li> <li>Instrumental protections.</li> <li>Alarm on abnormal level changes in a (storage) tank. Stop producttransfer if amounds are larger than considered normal.</li> </ul> |
| Damage-limiting or preventing     | Design<br>Explosion related            | <ul style="list-style-type: none"> <li>Explosion hatches.</li> <li>Emergency cooling systems.</li> </ul>                                                                                                                                                                                                                                                                                                                                                                                                                                                                                                                                        |
| Damage-preventing                 | Design<br>ATEX related                 | <ul style="list-style-type: none"> <li>Avoiding flammable liquids.</li> <li>Covering with foam blankets (aut/man).</li> <li>Forced ventilation.</li> <li>Avoiding ignition sources, grounding.</li> <li>Nitrogen blanketing.</li> <li>Intrinsic safe.</li> </ul>                                                                                                                                                                                                                                                                                                                                                                                |
| Damage-limiting                   | Design<br>Containing                   | <ul style="list-style-type: none"> <li>The bund walls keep the product/fire away from other tanks.</li> <li>Sloped fire trench keep the fire under controle and away from other tanks/equipment.</li> <li>Prevent spread of flammable products via sewers.</li> <li>Release volumecontaining. Keep gas releases inside for safe scrubbing.</li> <li>Dubbel wall tanks and pipes to prevent leakage.</li> <li>Safety couplings (unique for one product).</li> </ul>                                                                                                                                                                              |
| Damage-limiting                   | Design<br>Compartmentation             | <ul style="list-style-type: none"> <li>Emergency stops. Immediate stop and go to a safe position.</li> <li>The break-away coupling prevents spills in case of a separation of the temporary connection.</li> <li>Detection of a loss of containment in combination with an automatic compartmentation.</li> <li>Devide in smaller volume sections that when a loss of containment take place only the small volume is lost.</li> <li>Checkvalves. Stop product going back with a unwanted effect as a consequence.</li> <li>Fire activated valves. Spring-loaded valve closes if a fire melt a substance that keep the valve open.</li> </ul>   |
| Damage-limiting                   | Design<br>Limit fire damage            | <ul style="list-style-type: none"> <li>Automatic sprinklers with or without foam addition.</li> <li>Fire resistant materials.</li> <li>Fire retardant materials.</li> <li>Fire proof due structure sprinklers.</li> <li>Automatic or semiautomatic deluges with sprinklerheads as detection or other detection system.</li> <li>Fire protection for electrical installations.</li> </ul>                                                                                                                                                                                                                                                        |
| Damage-limiting and or preventing | Design<br>Evacuation<br>Safety shelter | <ul style="list-style-type: none"> <li>Area protection against pressure waves.</li> <li>Area protection against toc gases (air tight), manually or (semi)automatic systems.</li> <li>Area protection against radiation IR, ...</li> <li>Decreasing staffing possibility's in the still active zones.</li> <li>Alarm on the airquality intake.</li> </ul>                                                                                                                                                                                                                                                                                        |

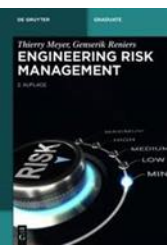

# New trends in process safety?



# Safety in organisations (a.o. process safety)

- Law & crimin.
- Economics
- Engineering
- Mathematics
- Psychology
- Sociology
- S&S Sciences
- Emergency Sc.
- Comm. Sc.
- Business & Mgt.
- Philosophy

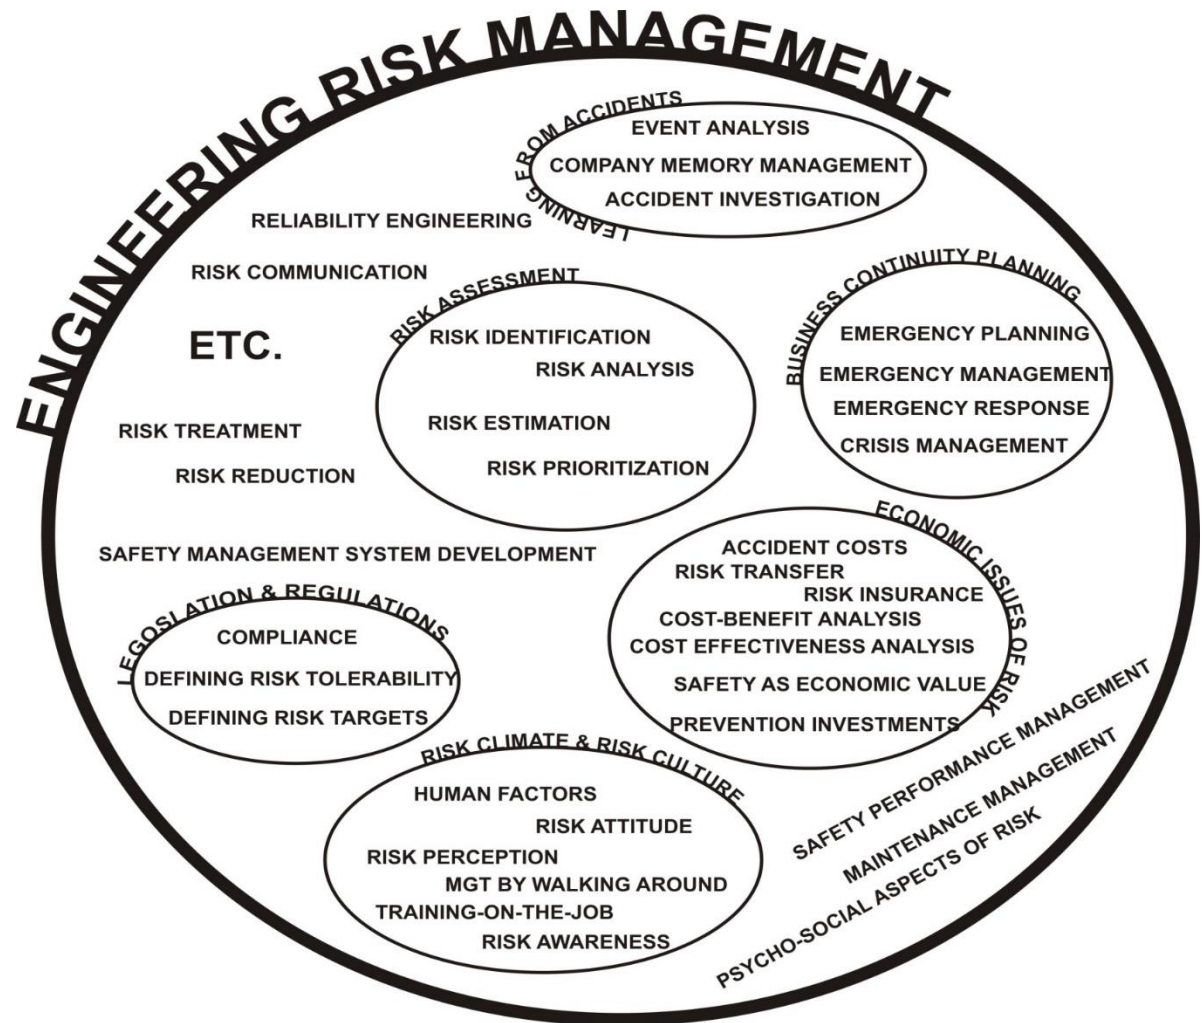



# Process safety in organisations - Using the Bow-tie

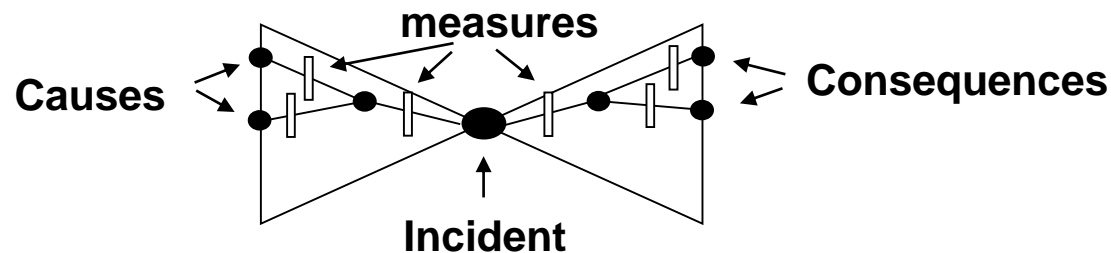

- **PRO-ACTIVE PHASE:** collaboration (scale +  $O^3$ ), dynamic risk assessments, big data, economic analyses, security TAs, harsh environments, performance mgt, trans-disciplinary solutions, systemic solutions / barriers, educate people pro-active communication (safety apps), 'culture' (single + cross-c), how safe is safe enough / ethics, mental models
- **INCIDENT PHASE:** use real-time data to make assessments, big data, communication, collaboration, simulation exercises: more 'real' and more involvement from public; serious games
- **RE-ACTIVE PHASE:** collaboration (scale +  $O^3$ ), communication, psychological aspects

# Different possibilities for advancing process safety

- Old wine in old barrels: keep using successful safety models/theories/practices/algorithms/software/... → companies
- Old wine in new barrels: use of new algorithms/software with the same old data/info to further improve/optimize solutions (faster etc.)  
→ consultants (and universities)
- New wine in old barrels: use of new data/info (e.g. big data) using the old algorithms/software to further improve/optimize (more accurate etc.) → consultants (and universities)
- New wine in new barrels: new info/data and new algorithms/software (e.g. domino effects in QRA, dynamic risk assessments, big data linked to real-time risk software, innovative communication tools, etc.) → universities



# Process safety in society: a complex problem

- When is 'safe', 'safe enough'?
  - Problem surrounding the **acceptability** of risks  
(solution = 'AND' story; collaboration and research)
- How much should one invest in safety?
  - Problem surrounding **costs and benefits**  
**disproportionality** of risks  
(solution = fundamental and applied research)
- Does the perceived risk correspond to the real risk?
  - Problem surrounding the **perception** of risks  
(solution = education)



# Process safety: an 'AND' story

- Specialistic AND Generalistic
- Technology AND HOFS
- Reactive AND Proactive
- Short-term AND Long-term
- Top-down AND Bottom-up
- Normal acc. AND Disaster
- Operational AND Strategic
- Blue-collar AND White-collar
- Simple AND Complicated
- Individu AND Group
- Confidential AND Transparant
- Static AND Dynamic
- Realist/Pragmatic AND Dreamer/Idealistic
- Analytic AND Systemic
- Current practice AND Innovation
- Linear AND Cyclic
- Practical AND Theoretical/Fundamental/Conceptual
- Mono-disc. AND Multi-disc. AND inter-disc. AND trans-disc.

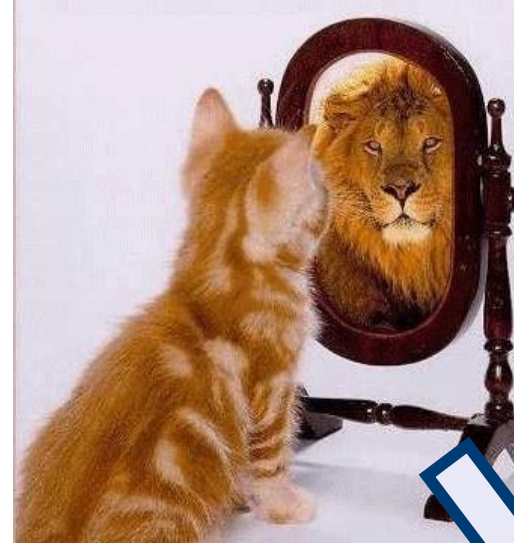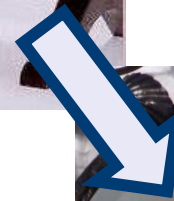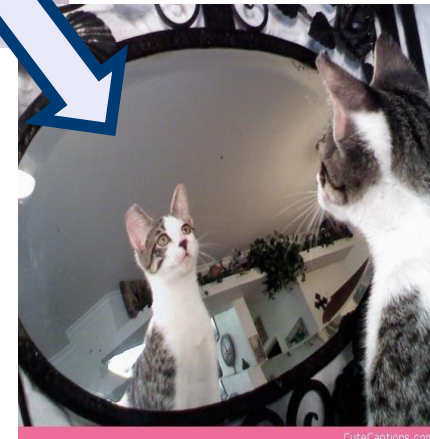

# Things to remember in relation to risks in the chemical industry

- There exist different types of risk (**occupational safety versus process safety**) → treat them differently with respect to safety investments
- Safety (also process safety) is an important domain of excellence → (occ & process) safety is 'not losing money' (is identical to 'winning money'!)
- **Process safety: still much improvement to make, technological as well as HOFs-related!**



# Safety versus security?



## “Security risk” examples

|            |                                                                               |                   |       |
|------------|-------------------------------------------------------------------------------|-------------------|-------|
|            |                                                                               | Small             | Large |
| Likelihood | Most security issues: burglary, swindle, attempted murder, manslaughter, etc. | War, Civil war .. |       |
|            | Murder                                                                        | Terrorist attacks |       |
|            |                                                                               | Small             | Large |

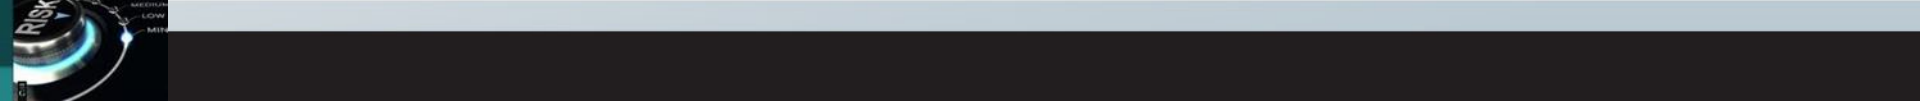

Supplement: Supplementary file 1 [file 9783110418040_ERM%20presentation%20slides%203.pdf]
